# Supplementary material for: Petrogenesis of Shihuiyao Rare-Metal Granites in the Southern Great Xing’an Range, NE China
Source: MDPI journal article supplement (doi:10.3390/min13050701), 2023-05-21
Supplement: s1 [file s1]

Supplementary Table S1. Partition coefficients used for modeling Rayleigh fractionation.

| Element | Quartz             | K-feldspar        | Plagioclase        | Biotite           | Monazite          |
|---------|--------------------|-------------------|--------------------|-------------------|-------------------|
| Rb      | 0.012 <sup>a</sup> | 1.08 <sup>b</sup> | 0.091 <sup>d</sup> | 2.51 <sup>d</sup> | -                 |
| Sr      | 0.001 <sup>*</sup> | 2.50 <sup>b</sup> | 4.12 <sup>d</sup>  | 0.08 <sup>d</sup> | -                 |
| Cs      | 0.022 <sup>a</sup> | 0.11 <sup>c</sup> | 0.047 <sup>d</sup> | 0.62 <sup>e</sup> | -                 |
| La      | 0.014 <sup>a</sup> | 0.07 <sup>c</sup> | 0.393 <sup>e</sup> | 0.61 <sup>e</sup> | 1504 <sup>f</sup> |
| Ce      | 0.006 <sup>a</sup> | 0.02 <sup>c</sup> | 0.251 <sup>e</sup> | 0.32 <sup>e</sup> | 1518 <sup>f</sup> |

Data sources: a = Nash, W.P., Crecraft, H.R. Partition coefficients for trace elements in silicic magmas. *Geochimica et Cosmochimica Acta* **1986**, 49, 2309-2322.

b = Long, P.E. Experiment determination of partition coefficients for Rb, Sr and Ba between alkali feldspar and silicate liquid. *Geochimica et Cosmochimica Acta* **1978**, 42, 833-846.

c = Stix, J., Gorton, M.P. Variations in trace element partition coefficients in sanidine in the Cerro Toledo Rhyolite, Jemez Mountains, New Mexico: Effects of composition, temperature, and volatiles. *Geochimica et Cosmochimica Acta* **1990**, 54, 2697-2708.

d = Fujimaki, H., Tatsumoto, M., Aoki, K. Partition coefficients of Hf, Zr and REE between phenocrysts and groundmasses. *Journal of Geophysical Research* **1984**, 89, B662-B672.

e = Were, P., Keppler H. Trace element fractionation between biotite, allanite, and granitic melt. *Contributions to Mineralogy and Petrology* **2021**, 176, No. 74.

f = Stepanov, A.S., Hermann, J., Rubatto, D., Rapp, R.P. Experimental study of monazite/melt partitioning with implications for the REE, Th and U geochemistry of crustal rocks. *Chemical Geology* **2012**, 300-301, 200-220.

\*assumed.
